# Supplementary material for: The complete catalytic mechanism of xanthine oxidase: a computational study
Source: Royal Society of Chemistry journal article supplement (doi:10.1039/d0qi01029d), 2020-11-02
Supplement: d0qi01029d2.pdf [file d0qi01029d2.pdf]

# The complete catalytic mechanism of Xanthine Oxidase: a computational study

*Pedro M. G. Ribeiro<sup>\*‡</sup>, Henrique S. Fernandes<sup>\*‡</sup>, Luísa B. Maia<sup>‡</sup>, Sérgio F. Sousa<sup>\*</sup>, José J. B. Moura<sup>‡</sup>, Nuno M. F. S. A. Cerqueira<sup>\*</sup>*

<sup>\*</sup> UCIBIO@REQUIMTE, BioSIM, Departamento de Biomedicina, Faculdade de Medicina da Universidade do Porto, Alameda Professor Hernâni Monteiro, 4200-319 Porto, Portugal

<sup>‡</sup> LAQV, REQUIMTE, NOVA School of Science and Technology, *Campus* de Caparica, 2829-516 Caparica, Portugal

<sup>a</sup> Both authors have equally worked in the calculations presented in this article

**Supporting Information**

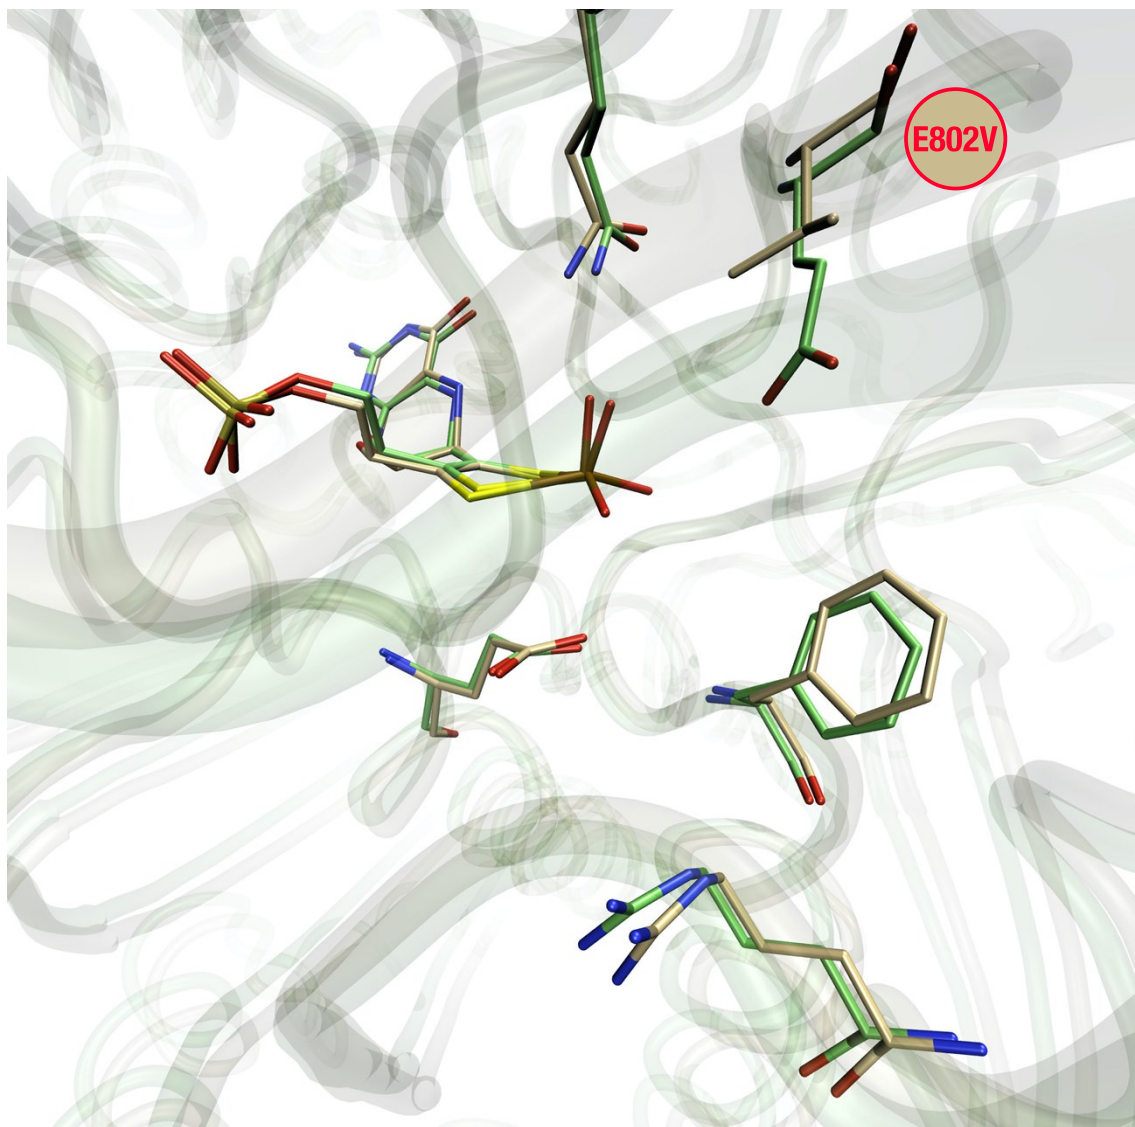

**Figure S 1.** Overlapping of the structures of the active site residues of bovine and human forms of xanthine oxidase.

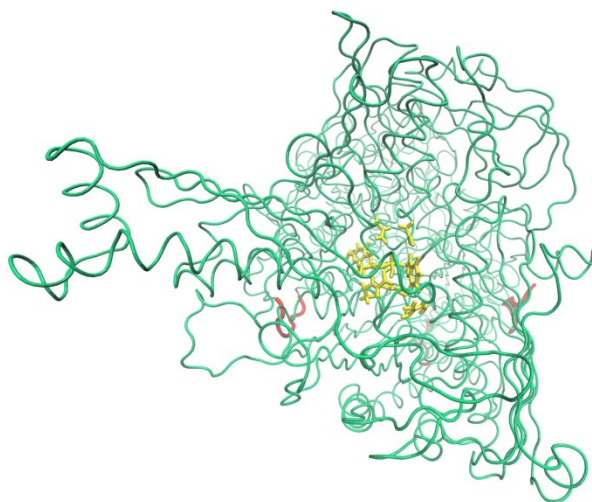

**Figure S 2.** Representation of the XO structure with the three regions modeled by homology highlighted in red. The active site residues and pterin cofactor are represented in licorice colored by yellow.

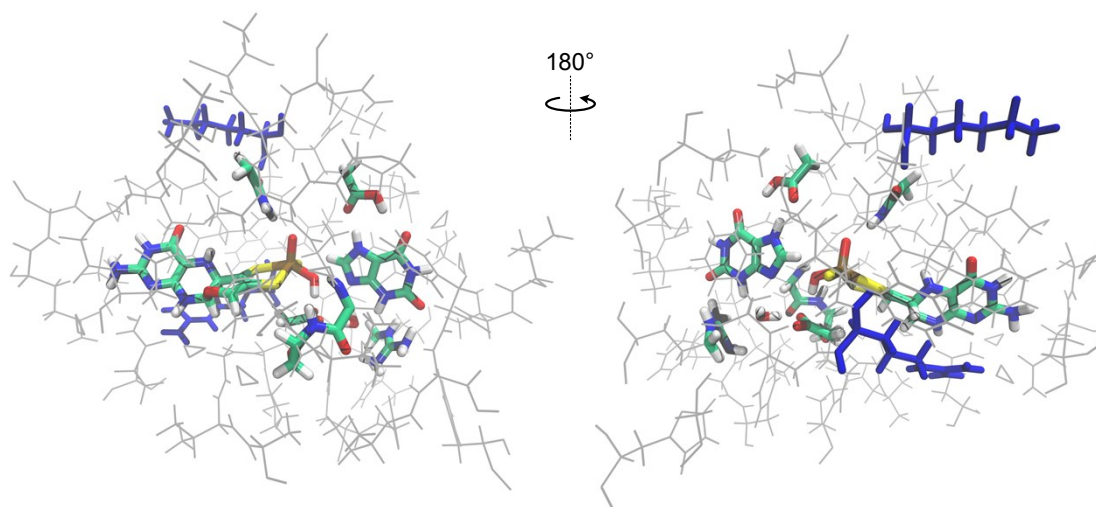

**Figure S 3.** Representation of all the atoms included in the high-level (HL) layer treated using quantum mechanics (licorice colored by element). The residues that are up to 5 Å from the HL layer were represented in grey lines, and the charged residues within that shell are highlighted in blue. A 180 ° rotation across the z-axis was applied from the left to the right images.

## Methodology: QM/MM Calculations (Detailed Version)

The initial structure for the QM/MM calculations was retrieved as a representative structure of the most populated cluster from the MD simulation<sup>1</sup>. The model was built using molUP<sup>2</sup> plugin for Visual Molecular Dynamics (VMD)<sup>3</sup> software. The QM/MM model includes the full protein, the substrate (XAN), the Moco, and a 4.0 Å coat of water molecules around the full protein. The coat of water molecules mimics the solvent effect (water) around the enzyme, through intermolecular interactions and limiting the free movements of the solvent-exposed parts of the enzyme. The total system is composed of about 24,500 atoms that were treated using two different theoretical methods following a 2-layers subtractive ONIOM QM/MM approach<sup>4-6</sup>: the high-level (HL) layer, which was calculated with density functional theory (DFT), and the low-level (LL) layer, which was calculated with molecular mechanics (MM). The HL layer included the Moco, a water molecule (two in the last step), the XAN (except for the last step) molecule, and the Ala1043, Ser1044, Arg844, Glu1225, Glu766, and Gln731 amino acid residues, accounting for 84 to 97 atoms (**Figure S3**). The remaining atoms of the system were included in the LL layer. Hydrogen atoms were used as link atoms to complete the valence of the bonds crossing between the two layers.

The geometry optimization of the HL layer was performed using the B3LYP<sup>7</sup> functional (DFT), based on the very good results in the study of biological systems. The 6-31G(d)<sup>8-12</sup> basis set and LanL2dz<sup>13</sup> pseudo-potential (Mo atom) were employed for the geometry optimizations as available in Gaussian 09<sup>14</sup>. During the catalytic mechanism, the oxidation state of Mo atom changes from +6 to +4, and back to +6 at the enzymatic turnover. The +6 state corresponds to a Mo atom with no valence electrons (Mo(VI): [Kr] 4d<sup>0</sup>). In the +4 state, Mo atom assumes the Mo(IV): [Kr] 4d<sup>2</sup> configuration, where two electrons are paired. Therefore, the spin multiplicity was set 1 for all the calculations.

The reactional space was explored through linear transit scans along with the reaction coordinates implicated in each step of the mechanism. Then, the transition states (TS)

were optimized, using the structures of higher energy obtained with the previous scans. Internal Reaction Coordinate (IRC) calculations were conducted to obtain the reactant and product for each step. The TSs were confirmed by vibrational frequency calculations, resulting in a single imaginary frequency with the correct transition vectors assigned. The vibrational frequency calculations were also conducted for the minima, confirming no imaginary frequencies. The zero-point energy (ZPE), thermal, and entropic energy corrections were estimated at 310.15 K and 1.0 bar during the frequency calculation of TS and related minima structures. The activation and reaction Gibbs free energies, for each step, were calculated through the difference between the computed Gibbs free energies of TS or product and the reactant, respectively.

The final energies were refined through single-point energy calculations using a more complete basis set: 6-311++G(3df,3pd)<sup>11, 15-19</sup>.

All the calculations were accomplished using Gaussian 09 software<sup>14</sup>, whereas the preparation of input files and analysis of results were made using molUP<sup>2, 20</sup> plugin for VMD<sup>3</sup>.

This general protocol has been used with success in the study of the catalytic mechanism of several different enzymes<sup>21-25</sup>, including other important Mo dependent systems<sup>26-28</sup>.

## References

1. N. M. F. S. A. Cerqueira, P. A. Fernandes and M. J. Ramos, Protocol for Computational Enzymatic Reactivity Based on Geometry Optimisation, *ChemPhysChem*, 2018, **19**, 669-689.
2. H. S. Fernandes, M. J. Ramos and N. M. F. S. A. Cerqueira, molUP: A VMD plugin to handle QM and ONIOM calculations using the gaussian software, *Journal of Computational Chemistry*, 2018, **39**, 1344-1353.
3. W. Humphrey, A. Dalke and K. Schulten, VMD: visual molecular dynamics, *Journal of Molecular Graphics*, 1996, **14**, 33-38, 27-38.
4. F. Maseras and K. Morokuma, IMOMM: A new integrated ab initio + molecular mechanics geometry optimization scheme of equilibrium structures

- and transition states, *Journal of Computational Chemistry*, 1995, **16**, 1170-1179.
5. M. Svensson, S. Humbel, R. D. J. Froese, T. Matsubara, S. Sieber and K. Morokuma, ONIOM: A Multilayered Integrated MO + MM Method for Geometry Optimizations and Single Point Energy Predictions. A Test for Diels–Alder Reactions and Pt(P(t-Bu)<sub>3</sub>)<sub>2</sub> + H<sub>2</sub> Oxidative Addition, *The Journal of Physical Chemistry*, 1996, **100**, 19357-19363.
  6. S. Dapprich, I. Komaromi, K. S. Byun, K. Morokuma and M. J. Frisch, A new ONIOM implementation in Gaussian98. Part I. The calculation of energies, gradients, vibrational frequencies and electric field derivatives, *J Mol Struct-Theochem*, 1999, **461**, 1-21.
  7. T. Yanai, D. P. Tew and N. C. Handy, A new hybrid exchange–correlation functional using the Coulomb-attenuating method (CAM-B3LYP), *Chem Phys Lett*, 2004, **393**, 51-57.
  8. R. Ditchfield, W. J. Hehre and J. A. Pople, Self-Consistent Molecular-Orbital Methods. IX. An Extended Gaussian-Type Basis for Molecular-Orbital Studies of Organic Molecules, *J. Chem. Phys.*, 1971, **54**, 724-728.
  9. W. J. Hehre, R. Ditchfield and J. A. Pople, Self-Consistent Molecular Orbital Methods. XII. Further Extensions of Gaussian-Type Basis Sets for Use in Molecular Orbital Studies of Organic Molecules, *J. Chem. Phys.*, 1972, **56**, 2257-2261.
  10. P. C. Hariharan and J. A. Pople, The influence of polarization functions on molecular orbital hydrogenation energies, *Theor. Chim. Acta*, 1973, **28**, 213-222.
  11. M. M. Francl, W. J. Pietro, W. J. Hehre, J. S. Binkley, M. S. Gordon, D. J. DeFrees and J. A. Pople, Self-consistent molecular orbital methods. XXIII. A polarization-type basis set for second-row elements, *J. Chem. Phys.*, 1982, **77**, 3654-3665.
  12. M. S. Gordon, J. S. Binkley, J. A. Pople, W. J. Pietro and W. J. Hehre, Self-consistent molecular-orbital methods. 22. Small split-valence basis sets for second-row elements, *J. Am. Chem. Soc.*, 1982, **104**, 2797-2803.
  13. P. J. Hay and W. R. Wadt, Ab initio effective core potentials for molecular calculations. Potentials for K to Au including the outermost core orbitals, *J. Chem. Phys.*, 1985, **82**, 299-310.
  14. M. J. Frisch, G. W. Trucks, H. B. Schlegel, G. E. Scuseria, M. A. Robb, J. R. Cheeseman, G. Scalmani, V. Barone, B. Mennucci, G. A. Petersson, H. Nakatsuji, M. Caricato, X. Li, H. P. Hratchian, A. F. Izmaylov, J. Bloino, G. Zheng, J. L. Sonnenberg, M. Hada, M. Ehara, K. Toyota, R. Fukuda, J. Hasegawa, M. Ishida, T. Nakajima, Y. Honda, O. Kitao, H. Nakai, T. Vreven, J. A. Montgomery Jr., J. E. Peralta, F. Ogliaro, M. J. Bearpark, J. Heyd, E. N. Brothers, K. N. Kudin, V. N. Staroverov, R. Kobayashi, J. Normand, K. Raghavachari, A. P. Rendell, J. C. Burant, S. S. Iyengar, J. Tomasi, M. Cossi, N. Rega, N. J. Millam, M. Klene, J. E. Knox, J. B. Cross, V. Bakken, C. Adamo, J. Jaramillo, R. Gomperts, R. E. Stratmann, O. Yazyev, A. J. Austin, R. Cammi,

- C. Pomelli, J. W. Ochterski, R. L. Martin, K. Morokuma, V. G. Zakrzewski, G. A. Voth, P. Salvador, J. J. Dannenberg, S. Dapprich, A. D. Daniels, Ö. Farkas, J. B. Foresman, J. V. Ortiz, J. Cioslowski and D. J. Fox, Gaussian 09. *Journal*, 2009.
15. R. Krishnan, J. S. Binkley, R. Seeger and J. A. Pople, Self-consistent molecular orbital methods. XX. A basis set for correlated wave functions, *J. Chem. Phys.*, 1980, **72**, 650-654.
  16. A. D. McLean and G. S. Chandler, Contracted Gaussian basis sets for molecular calculations. I. Second row atoms, Z=11-18, *J. Chem. Phys.*, 1980, **72**, 5639-5648.
  17. T. Clark, J. Chandrasekhar, G. W. Spitznagel and P. V. R. Schleyer, Efficient diffuse function-augmented basis sets for anion calculations. III. The 3-21+G basis set for first-row elements, Li-F, *J. Comput. Chem.*, 1983, **4**, 294-301.
  18. M. J. Frisch, J. A. Pople and J. S. Binkley, Self-consistent molecular orbital methods 25. Supplementary functions for Gaussian basis sets, *J. Chem. Phys.*, 1984, **80**, 3265-3269.
  19. G. W. Spitznagel, T. Clark, P. v. R. Schleyer and W. J. Hehre, An evaluation of the performance of diffuse function-augmented basis sets for second row elements, Na-Cl, *J. Comput. Chem.*, 1987, **8**, 1109-1116.
  20. H. S. Fernandes, S. F. Sousa and N. M. F. S. A. Cerqueira, VMD Store—A VMD Plugin to Browse, Discover, and Install VMD Extensions, *Journal of Chemical Information and Modeling*, 2019.
  21. R. P. Magalhães, H. S. Fernandes and S. F. Sousa, Modelling Enzymatic Mechanisms with QM/MM Approaches: Current Status and Future Challenges, *Israel Journal of Chemistry*, n/a.
  22. S. F. Sousa, A. J. M. Ribeiro, R. P. P. Neves, N. F. Brás, N. M. F. S. A. Cerqueira, P. A. Fernandes and M. J. Ramos, Application of quantum mechanics/molecular mechanics methods in the study of enzymatic reaction mechanisms, *WIREs Computational Molecular Science*, 2017, **7**, e1281.
  23. H. S. Fernandes, M. J. Ramos and N. Cerqueira, The Catalytic Mechanism of the Pyridoxal-5'-phosphate-Dependent Enzyme, Histidine Decarboxylase: A Computational Study, *Chemistry*, 2017, **23**, 9162-9173.
  24. H. S. Fernandes, M. J. Ramos and N. M. F. S. A. Cerqueira, Catalytic Mechanism of the Serine Hydroxymethyltransferase: A Computational ONIOM QM/MM Study, *ACS Catalysis*, 2018, DOI: 10.1021/acscatal.8b02321, 10096-10110.
  25. C. S. S. Teixeira, M. J. Ramos, S. F. Sousa and N. M. F. S. A. Cerqueira, Solving the Catalytic Mechanism of Tryptophan Synthase: an Emergent Drug Target in the Treatment of Tuberculosis, *ChemCatChem*, 2020, **12**, 227-237.
  26. N. M. F. S. A. Cerqueira, P. J. Gonzalez, P. A. Fernandes, J. J. G. Moura and M. J. Ramos, Periplasmic Nitrate Reductase and Formate Dehydrogenase: Similar Molecular Architectures with Very Different Enzymatic Activities, *Accounts of Chemical Research*, 2015, **48**, 2875-2884.



27. N. M. F. S. A. Cerqueira, P. J. Gonzalez, C. D. Brondino, M. J. Romão, C. C. Romão, I. Moura and J. J. G. Moura, The effect of the sixth sulfur ligand in the catalytic mechanism of periplasmic nitrate reductase, *Journal of Computational Chemistry*, 2009, **30**, 2466-2484.
28. N. M. F. S. A. Cerqueira, P. A. Fernandes, P. J. Gonzalez, J. J. G. Moura and M. J. Ramos, The Sulfur Shift: An Activation Mechanism for Periplasmic Nitrate Reductase and Formate Dehydrogenase, *Inorganic Chemistry*, 2013, **52**, 10766-10772.
